# Supplementary material for: Genomic landscape of colitis-associated cancer indicates the impact of chronic inflammation and its stratification by mutations in the Wnt signaling
Source: PubMed Central journal article supplement (PMC5787528; doi:10.18632/oncotarget.22867), 2017-12-12
Supplement: oncotarget-09-969-s001.pdf [file oncotarget-09-969-s001.pdf]

# Genomic landscape of colitis-associated cancer indicates the impact of chronic inflammation and its stratification by mutations in the Wnt signaling

## SUPPLEMENTARY MATERIALS

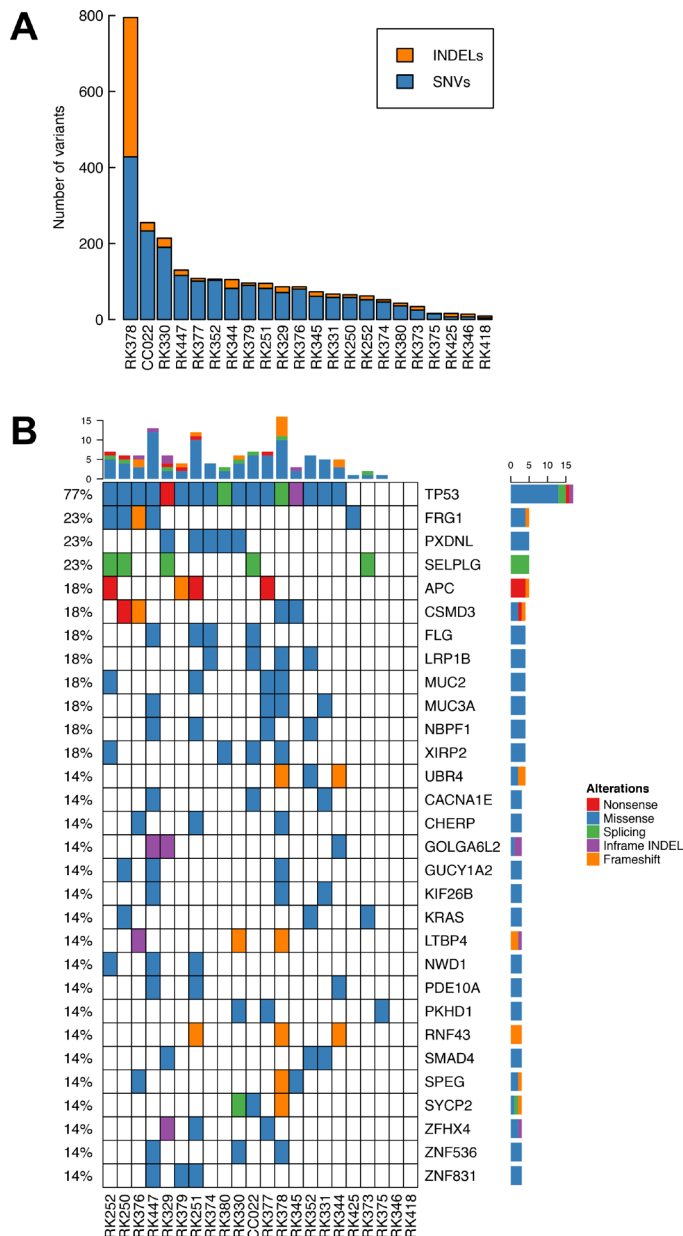

Supplementary Figure 1: Mutations in the whole-exome sequencing of 22 UC-associated cancers. (A) Number of somatic mutations. (B) Recurrently mutated genes. Genes that were mutated in more than 2 patients and had mutation rate of >10/Mbp were shown.

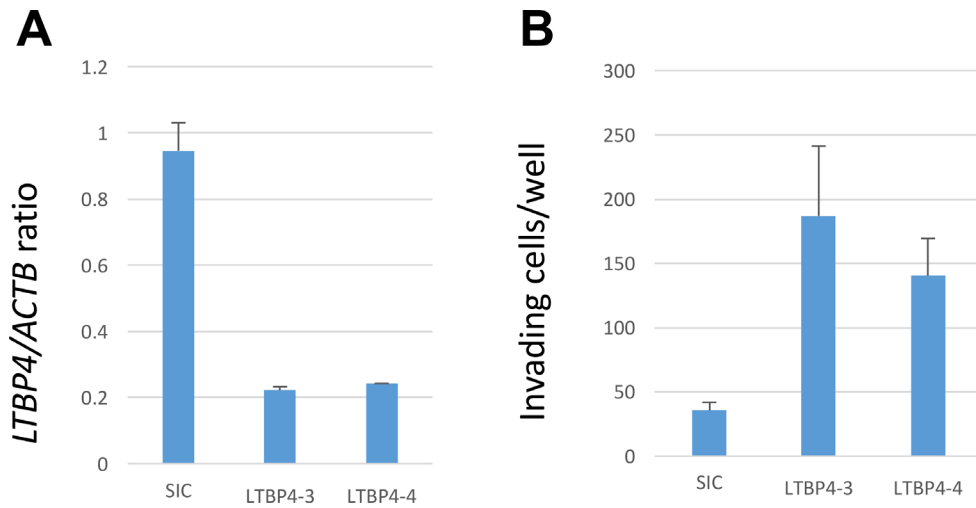

**Supplementary Figure 2: Silencing *LTBP4* promoted invasion of SW480 colon cancer cell line. (A)** Efficacy of *LTBP4* silencing as measured by quantitative RT-PCR. **(B)** Invasiveness of *LTBP4*-silenced cells.

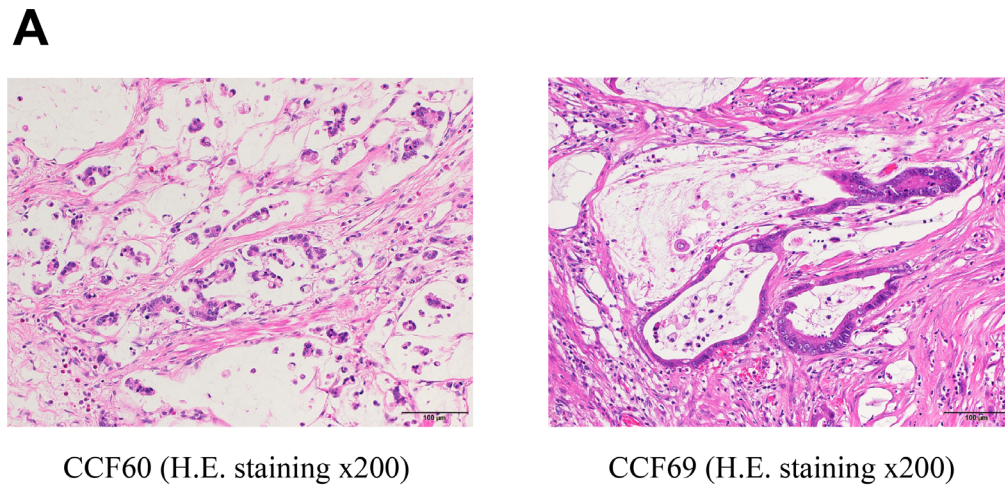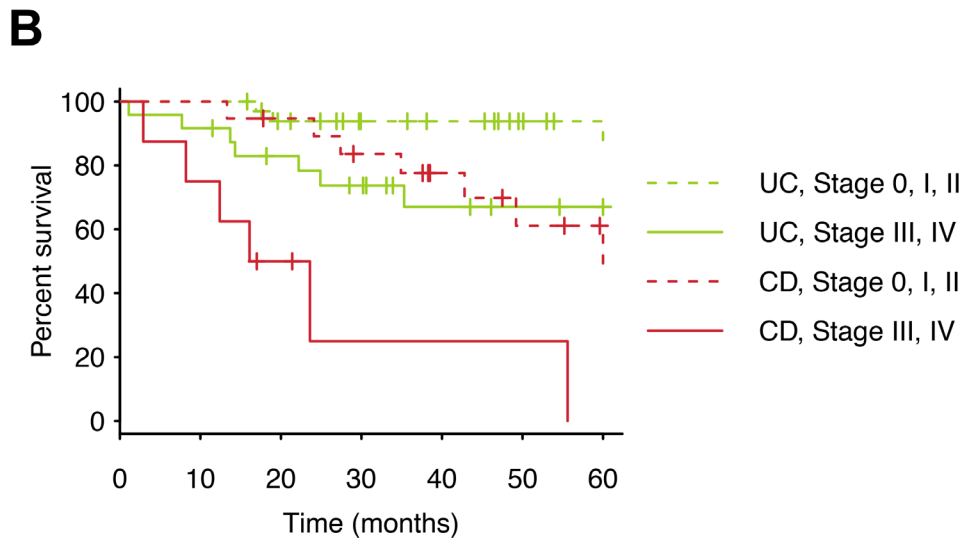

**Supplementary Figure 3: Unique features of CD-CAC. (A)** Mucinous carcinoma arising in anal canal and hemorrhoid fistula in Japanese Crohn's disease. CCF60 (H.E. staining  $\times 200$ ) and CCF69 (H.E. staining  $\times 200$ ). **(B)** Overall survival of CAC patients. Patients were grouped as follows: UC, stage 0, I, II ( $n = 34$ ); UC, stage III, IV ( $n = 24$ ); CD, stage 0, I, II ( $n = 19$ ); CD, stage III, IV ( $n = 8$ ).

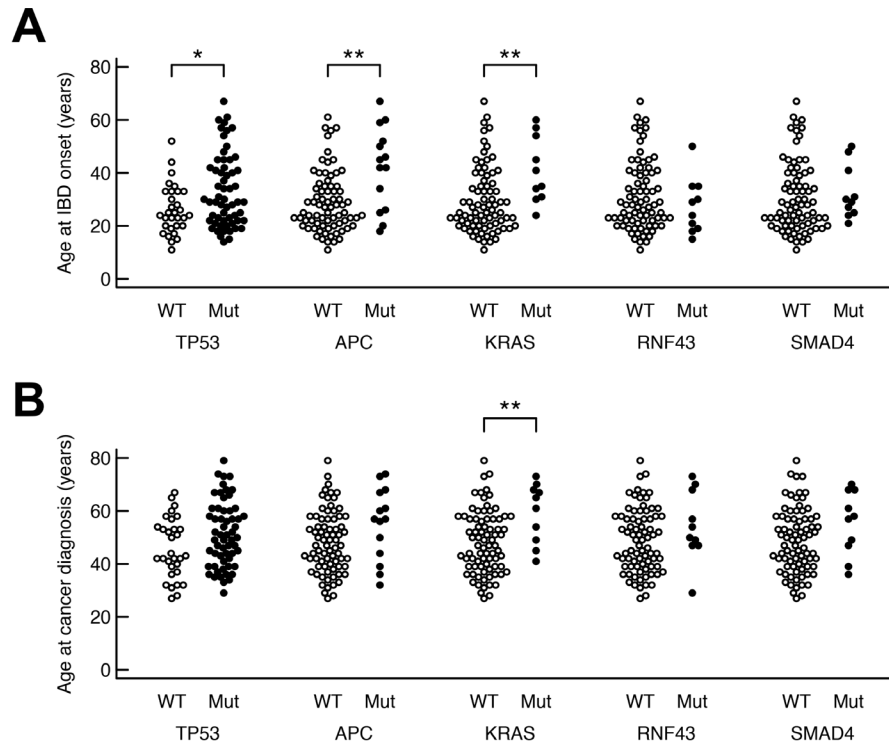

**Supplementary Figure 4: Association of mutations and timeline of disease in 90 CACs.** (A) Mutations and the age at IBD onset. (B) Mutations and the age at cancer diagnosis. \*\**p*-value < 0.01; \**p*-value < 0.05 using Wilcoxon rank sum test.

**Supplementary Table 1: Clinico-pathological features of the colitis-associated cancers (CACs).** See Supplementary\_Table\_1

**Supplementary Table 2: Sequence information of siRNAs**

| Duplex name | Sense                         | Antisense                     |
|-------------|-------------------------------|-------------------------------|
| LTBP4-3     | 5'-CUCCUUUGCCUGUACUUGUdTdT-3' | 5'-ACAAGUACAGGCAAAGGAGdTdT-3' |
| LTBP4-4     | 5'-CAGACUUAGGUCCACCUUAdTdT-3' | 5'-UAAGGUGGACCUAAGUCUGdTdT-3' |

**Supplementary Table 3: Summary of exome sequencing of 22 CACs.** See Supplementary\_Table\_3

**Supplementary Table 4: Somatic mutations in the 22 CAC exomes.** See Supplementary\_Table\_4

**Supplementary Table 5: Targeted genes for resequencing of the 90 CAC.** See Supplementary\_Table\_5

**Supplementary Table 6: Sequencing metrics in the targeted resequencing of 90 CACs.** See Supplementary\_Table\_6

**Supplementary Table 7: Mutations in the targeted resequencing of 90 CACs.** See Supplementary\_Table\_7
